# Supplementary material for: Highly reactive iron/nickel bimetallic biochar composites for highly efficient remediation of Cr(vi)
Source: Royal Society of Chemistry journal article supplement (doi:10.1039/d5nj00107b), 2025-01-01
Supplement: d5nj00107b1.pdf [file d5nj00107b1.pdf]

## Supporting Information

### Highly reactive iron/nickel bimetallic biochar composites for highly efficient remediation of Cr(VI)

#### Contents

|                                                                                                                                          |   |
|------------------------------------------------------------------------------------------------------------------------------------------|---|
| Supplementary Figures .....                                                                                                              | 2 |
| Fig. S1 Comparison of the adsorption effect of Cr(VI) on BC@Fe-900-3(a), BC@FeNi-900-X(a) and BC@FeNi-T-3(b) .....                       | 2 |
| Fig. S2 Effect of BC@Fe-900-3 and BC@FeNi-900-3 on Cr(VI) adsorption under different pH, and Zeta potential values of BC@FeNi-900-3..... | 2 |
| Fig. S3 Activity inhibition experiment of Cr(VI) adsorption by BC@FeNi-900-3.....                                                        | 3 |
| Fig. S4 Cycling experiments of Cr(VI) adsorption by BC@FeNi-900-3 .....                                                                  | 3 |
| Fig. S5 Adsorption effect of BC@FeNi-900-3 on Cr(VI) in simulated polluted liquid.....                                                   | 4 |

## Supplementary Figures

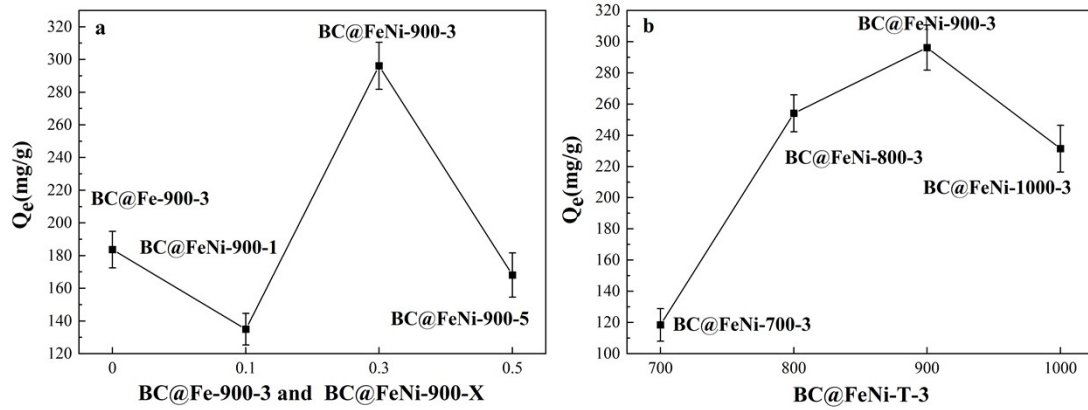

Fig. S1 Comparison of the adsorption effect of Cr(VI) on BC@Fe-900-3(a), BC@FeNi-900-X(a) and BC@FeNi-T-3(b)

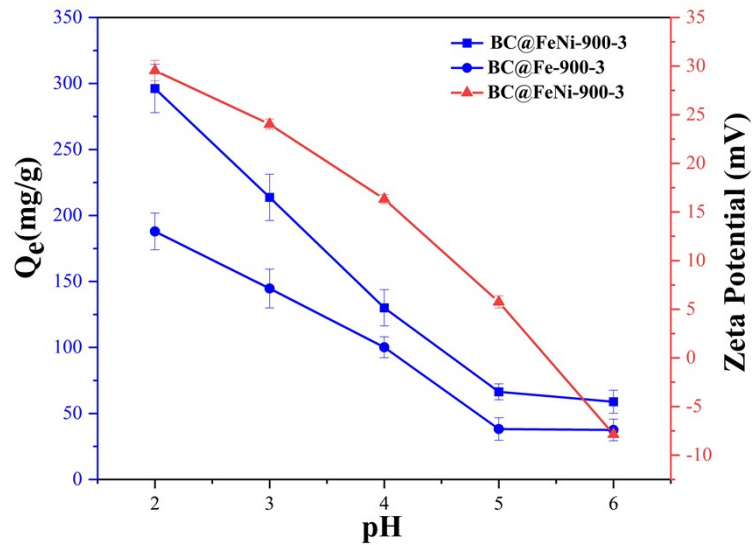

Fig. S2 Effect of BC@Fe-900-3 and BC@FeNi-900-3 on Cr(VI) adsorption under different pH, and Zeta potential values of BC@FeNi-900-3

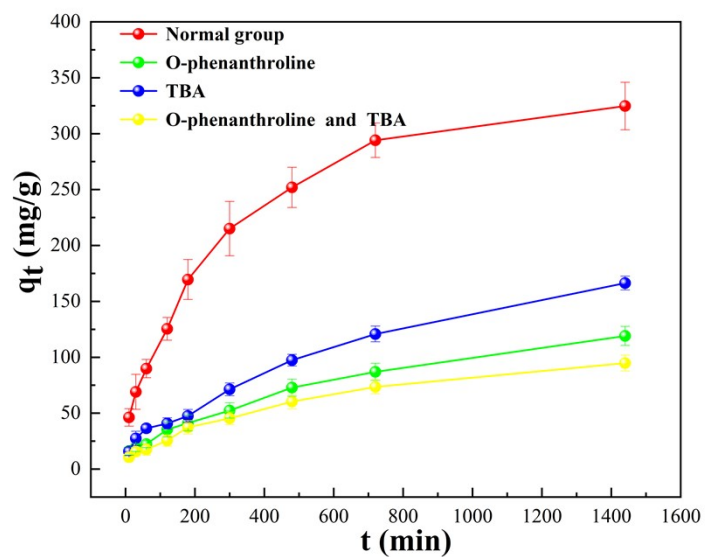

Fig. S3 Activity inhibition experiment of Cr(VI) adsorption by BC@FeNi-900-3

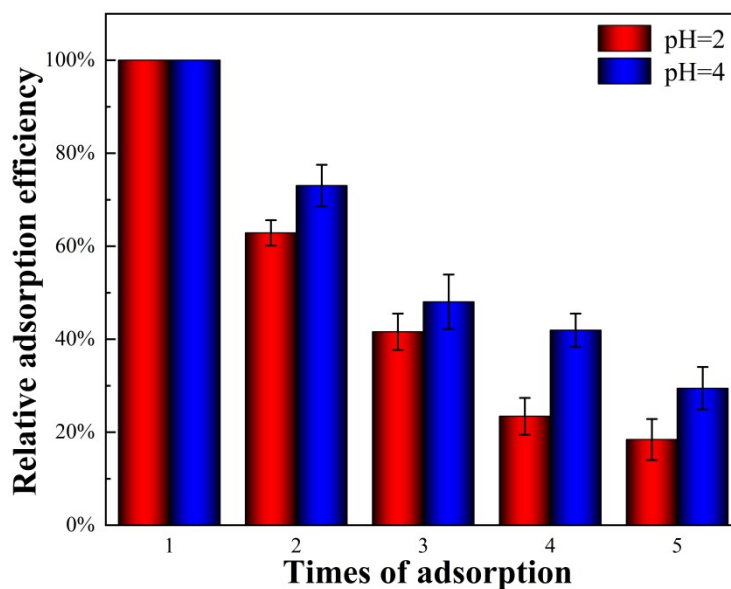

Fig. S4 Cycling experiments of Cr(VI) adsorption by BC@FeNi-900-3

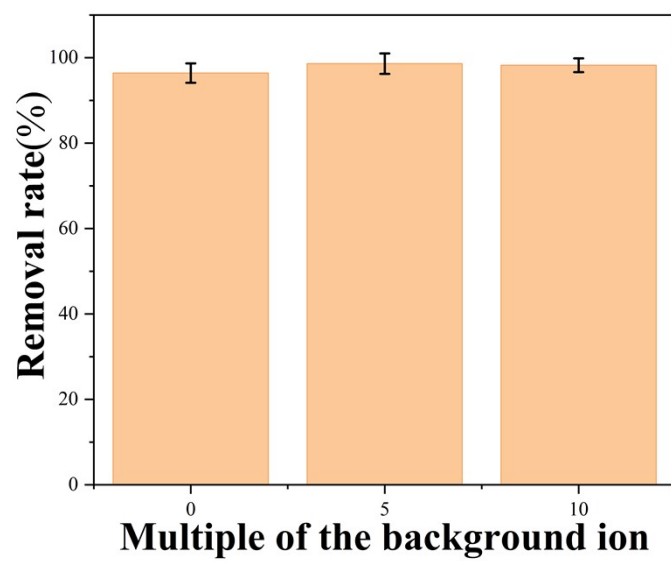

**Fig. S5 Adsorption effect of BC@FeNi-900-3 on Cr(VI) in simulated polluted liquid**
